# Supplementary material for: Validation of Pan-Arctic Soil Temperatures in Modern Reanalysis and Data Assimilation Systems
Source: Copernicus journal article supplement (doi:10.5194/tc-2022-5), 2022-01-25
Supplement: Supplementary file 1 [file TC-2022-5_InSitu_MetaData.xlsx]

## Sheet: Dataset_Summary
Dataset	Number of Sites	Data Download (if available)	Reference(s)
Global Terrestrial Network for Permafrost (GTN-P)	68	http://gtnpdatabase.org/boreholes	GTN-P: GTN-P global mean annual ground temperature data for permafrost near the depth of zero annual amplitude (2007-2016), Supplement to: Biskaborn, Boris K; Smith, Sharon L; Noetzli, Jeannette; Matthes, Heidrun; Vieira, Gon�alo; Streletskiy, Dmitry A; Schoeneich, Philippe; Romanovsky, Vladimir E; Lewkowicz, Antoni G; Abramov, Andrey; Allard, Michel; Boike, Julia; Cable, William L; Christiansen,…
Heather Kropp (2021)	229	https://arcticdata.io/catalog/view/doi%3A10.18739%2FA2736M31X	Heather Kropp, Michael Loranty, Britta Sannel, Jonathan O'Donnell, Elena Blanc-Betes, Sean Cahoon, Steven Mamet, Daan blok, Ken Tape, Marguerite Mauritz, Mathew Williams, Julia Boike, Inge Grunberg, Peter Lafleur, Eugenie Euskirchen, Oliver Sonnentag, Jan Hjort, M Torre Jorgenson, Isla Myers-Smith, David Olefeldt, ... Kim Yongwon. (2020). Synthesis of soil-air temperature and vegetation measureme…
Russian-Hydromet Network	458	http://aisori-m.meteo.ru/waisori/index0.xhtml	Sherstiukov, A.: Dataset of daily soil temperature up to 320 cm depth based on meteorological stations of Russian Federation [In Russian], Trudy VNIIGMI-MTsD, 176, 224–232, 2012.
Nordicana	34	https://nordicana.cen.ulaval.ca/en_index.aspx	Varies (See Nordicana Metadata)
NWT Open Report 2017-009	73	https://app.nwtgeoscience.ca/Searching/ReferenceSearch.aspx	Cameron, E. A., Lantz, T. C., O’Neill, H. B., Gill, H. K., Kokelj, S. V., and Burn, C. R.: Permafrost Ground Temperature Report: Ground temperature variability among terrain types in the Peel Plateau region of the Northwest Territories (2011-2015), Northwest Territories Geological Survey, Northwest Territories, Canada, 2019.
NWT Open Report 2018-009	214	https://app.nwtgeoscience.ca/Searching/ReferenceSearch.aspx	Gruber, S., Brown, N., Stewart-Jones, E., Karunaratne, K., Riddick, J., Peart, C., Subedi, R., and Kokelj, S. V.: Permafrost Ground Temperature Report: Ground temperature and site characterisation data from the Canadian Shield tundra near Lac de Gras, Northwest Territories, Canada, Northwest Territories Geological Survey, Northwest Territories, Canada, 2019.
NWT Open Report 2019-004	9	https://app.nwtgeoscience.ca/Searching/ReferenceSearch.aspx	Ensom, T., Kokelj, S. V., and McHugh, K. K.: Permafrost Ground Temperature Report: Inuvik to Tuktoyaktuk Highway stream crossing and alignment sites, Northwest Territories, Northwest Territories Geological Survey, Northwest Territories, Canada, 2020.
NWT Open Report 2019-017	31	https://app.nwtgeoscience.ca/Searching/ReferenceSearch.aspx	Rudy, A. C. A., Kokelj, S. V., Morse, P. D., and Ensom, T.: Permafrost Ground Temperature Report: Inuvik to Tukyoyaktuk Highway Sentinel Sites, Northwest Territories, Northwest Territories Geological Survey, Yellowknife, NWT, Canada, 2020.
Street and Wookey (2016)	5	https://doi.org/10.5285/10839b38-cc29-4a07-999a-ac32e3f70609	Street, L.; Wookey. P. (2016). Soil temperature, soil moisture, air temperature and relative humidity for vegetation at Siksik Creek, North West Territories, Canada. NERC Environmental Information Data Centre. https://doi.org/10.5285/10839b38-cc29-4a07-999a-ac32e3f70609
Yukon Permafrost Database	112	https://ygsftp.gov.yk.ca/PermafrostDB/Data/	Yukon Geological Survey: Yukon permafrost reports data. In: Yukon Permafrost Database. Government of Yukon, 2021.
Baker Creek	6	https://gwfnet.net/Metadata/Record/T-2021-10-20-n1xlAwMdpxE61Pn178H3F9aQ	Spence, C. and Hedstrom, N.: Hydrometeorological data from Baker Creek Research Watershed, Northwest Territories, Canada, Earth Syst. Sci. Data, 10, 1753–1767, 2018.
Cariboo Alpine MesoNET	12	https://zenodo.org/record/6518969#.YtLVmXbMI2x	Hernández-Henríquez, M. A., Sharma, A. R., Taylor, M., Thompson, H. D., and Déry, S. J.: The Cariboo Alpine Mesonet: sub-hourly hydrometeorological observations of British Columbia’s Cariboo Mountains and surrounding area since 2006, 18, 2018.
			Déry, S.: Cariboo Alpine Mesonet (CAMnet) Database, 2017.
Burns Bog	1	https://ibis.geog.ubc.ca/~micromet/webdata/resources/csv/	Lee, S.-C., Christen, A., Black, A. T., Johnson, M. S., Jassal, R. S., Ketler, R., Nesic, Z., and Merkens, M.: Annual greenhouse gas budget for a bog ecosystem undergoing restoration by rewetting, Biogeosciences, 14, 2799–2814, https://doi.org/10.5194/bg-14-2799-2017, 2017.
Manitoba Mesoscale Network	85	https://www.gov.mb.ca/agriculture/weather/current-weather-viewer.html	RoTimi Ojo, E. and Manaigre, L.: The Manitoba Agriculture Mesonet: Technical Overview, Bulletin of the American Meteorological Society, 102, E1786–E1804, https://doi.org/10.1175/BAMS-D-20-0306.1, 2021.
Enviro-Weather Michigan Automated Weather Network (MAWN)	75	https://mawn.geo.msu.edu/	Enviro-weather: Enviro-weather Automated Weather Station Network, 2022.
Alberta Climate Information Service	31	https://acis.alberta.ca/	Alberta Agriculture, Forestry and Rural Economic Development: Current and Historical Alberta Weather Station Data., 2022.
North Dakota Automated Mesonet Newtwork (NDAWN)	150	https://ndawn.ndsu.nodak.edu/	North Dakota Mesonet Network: The North Dakota Mesonet Network, 2022.

## Sheet: GTN-P
Station ID	GTN-P Borehole	Filename	Lat (oN)	Lon (oE)
1	54	Borehole_54-Azarova-1-Dataset_1394.csv	56.9	117.58
2	65	Borehole_65-Ivotuk_3-Dataset_814.csv	68.48	-155.73
3	65	Borehole_65-Ivotuk_3-Dataset_815.csv	68.48	-155.73
4	74	Borehole_74-Ivotuk_4-Dataset_811.csv	68.48	-155.73
5	74	Borehole_74-Ivotuk_4-Dataset_819.csv	68.48	-155.73
6	74	Borehole_74-Ivotuk_4-Dataset_820.csv	68.48	-155.73
7	87	Borehole_87-Deadhorse_1_surface-Dataset_654.csv	70.16	-148.47
8	88	Borehole_88-Deadhorse_2_new_instrumentation-Dataset_656.csv	70.16	-148.47
9	93	Borehole_93-Howe_Island_1_b-Dataset_1445.csv	70.32	-147.99
10	93	Borehole_94-Howe_Island_1_ib-Dataset_1447.csv	70.32	-147.99
11	94	Borehole_94-Howe_Island_1_ib-Dataset_1448.csv	70.32	-147.99
12	95	Borehole_95-Happy_Valley_1_b-Dataset_668.csv	69.15	-148.85
13	103	Borehole_103-Franklin_Bluffs_dry_b-Dataset_663.csv	69.67	-148.72
14	104	Borehole_104-Franklin_Bluffs_dry_be-Dataset_664.csv	69.67	-148.72
15	105	Borehole_105-Franklin_Bluffs_dry_ib-Dataset_665.csv	69.67	-148.72
16	106	Borehole_106-Franklin_Bluffs_surface-Dataset_660.csv	69.66	-148.72
17	107	Borehole_107-Franklin_Bluffs_wet_b-Dataset_666.csv	69.66	-148.72
18	110	Borehole_110-Happy_Valley_1_ib-Dataset_1443.csv	69.15	-148.84
19	116	Borehole_116-Sagwon_MNT-Dataset_212.csv	69.43	-148.67
20	118	Borehole_118-West_Dock_1_surface-Dataset_615.csv	70.37	-148.55
21	118	Borehole_118-West_Dock_1_surface-Dataset_618.csv	70.37	-148.55
22	174	Borehole_174-Nadym_ND2-Dataset_632.csv	65.31	72.89
23	175	Borehole_175-Nadym_ND3-Dataset_638.csv	65.31	72.86
24	176	Borehole_176-Nadym_ND3_4-Dataset_644.csv	65.31	72.86
25	177	Borehole_177-Nadym_PiCla-Dataset_649.csv	65.31	72.89
26	178	Borehole_178-Nadym_Pingo-Dataset_647.csv	65.3	73
27	224	Borehole_224-Belenkiy-1-Dataset_1397.csv	56.76	118.9
28	227	Borehole_227-Ushelistiy-1-Dataset_1408.csv	56.54	118.48
29	466	Borehole_466-Kamchatka_3_06-Dataset_1504.csv	55.99	160.51
30	519	Borehole_519-Barrow-Dataset_2035.csv	71.29	-156.77
31	535	Borehole_535-ILU2007-01-Dataset_1102.csv	69.22	-51.1
32	618	Borehole_618-Smith_Lake_3-Dataset_1145.csv	64.87	-147.86
33	619	Borehole_619-Smith_Lake_4-Dataset_1146.csv	64.87	-147.86
34	620	Borehole_620-Smith_Lake_2-Dataset_1144.csv	64.87	-147.86
35	686	Borehole_686-Kerak-Dataset_1373.csv	57.98	125.5
36	692	Borehole_692-Aldan_D-1-Dataset_1374.csv	57.53	124.53
37	746	Borehole_746-Chevak-Dataset_2039.csv	61.54	-165.6
38	752	Borehole_752-Circle-Dataset_2042.csv	65.82	-144.07
39	755	Borehole_755-Arctic_Village-Dataset_2031.csv	68.13	-145.53
40	780	Borehole_780-Ambler-Dataset_2025.csv	67.08	-157.87
41	833	Borehole_833-Anaktuvuk_Pass-Dataset_2026.csv	68.15	-151.72
42	840	Borehole_840-Beaver-Dataset_2037.csv	66.36	-147.39
43	845	Borehole_845-Anderson-Dataset_2028.csv	64.35	-149.2
44	849	Borehole_849-Gakona2-Dataset_1140.csv	62.39	-145.15
45	1107	Borehole_1107-Banks_Island-Dataset_1348.csv	73.22	-119.22
46	1107	Borehole_1107-Banks_Island-Dataset_1349.csv	73.22	-119.22
47	1108	Borehole_1108-Mould_Bay-Dataset_1354.csv	76.23	-119.3
48	1108	Borehole_1108-Mould_Bay-Dataset_1355.csv	76.23	-119.3
49	1108	Borehole_1108-Mould_Bay-Dataset_1356.csv	76.23	-119.3
50	1109	Borehole_1109-Isachsen-Dataset_1359.csv	78.78	-103.55
51	1109	Borehole_1109-Isachsen-Dataset_1362.csv	78.78	-103.55
52	1114	Borehole_1114-Evota-Dataset_1372.csv	57.54	125.18
53	1116	Borehole_1116-Belenkiy-2-Dataset_1400.csv	56.76	118.19
54	1118	Borehole_1118-Olkhon-Pit-Dataset_1415.csv	53.23	107.44
55	1137	Borehole_1137-Olkhon-4-Dataset_1433.csv	53.22	107.45
56	1142	Borehole_1142-Research_Valley_Borehole_1-Dataset_1458.csv	64.87	-111.55
57	1143	Borehole_1143-Research_Valley_Borehole_2-Dataset_1459.csv	64.87	-111.55
58	1181	Borehole_1181-Khanovey-1-Dataset_2104.csv	67.29	63.65
59	1182	Borehole_1182-Khanovey-2-Dataset_2107.csv	67.29	63.65
60	1183	Borehole_1183-Khanovey-3-Dataset_2108.csv	67.29	63.65
61	1184	Borehole_1184-Khanovey-4-Dataset_2109.csv	67.29	63.65
62	1185	Borehole_1185-Rhonda_Basin-Dataset_1535.csv	66.56	-164.48
63	1186	Borehole_1186-Rhonda_Upland-Dataset_1536.csv	66.56	-164.46
64	1188	Borehole_1188-Last_Bridge-Dataset_1533.csv	65.39	-164.66
65	1190	Borehole_1190-Marys_Igloo_East-Dataset_1534.csv	65.11	-164.7
66	1191	Borehole_1191-Salmon_Lake-Dataset_1537.csv	64.91	-165.05
67	1835	Borehole_1835-Belenkiy-3-Dataset_2096.csv	56.76	118.19
68	1841	Borehole_1841-Khanovey-7-Dataset_2110.csv	67.29	63.66

## Sheet: Kropp
Station ID	Kropp ID	Lat (oN)	Lon (oE)
69	1	68.46	20.9
70	2	65.69	-149.13
71	3	65.57	-148.92
72	4	65.57	-148.92
73	5	65.55	-148.9
74	6	68.63	-149.63
75	7	68.63	-149.63
76	8	68.63	-149.63
77	9	68.63	-149.63
78	10	67.1	-50.29
79	11	67.1	-50.29
80	12	63.29	-129.84
81	13	63.27	-130.1
82	14	63.27	-130.1
83	15	63.4	-129.67
84	16	63.31	-129.79
85	17	58.73	-93.84
86	18	58.73	-93.81
87	19	57.48	-93.24
88	20	58.75	-93.86
89	21	70.82	147.47
90	22	68.49	-159.91
91	23	68.36	-159.91
93	25	68.36	-159.91
94	26	68.36	-159.91
95	27	68.26	-159.92
96	28	68.26	-159.92
97	29	68.26	-159.92
98	30	63.88	-149.23
99	31	63.88	-149.23
100	32	63.88	-149.23
101	33	63.88	-149.23
102	34	63.88	-149.23
103	35	63.88	-149.22
104	36	63.88	-149.23
105	37	63.88	-149.23
106	38	63.88	-149.23
107	39	63.88	-149.23
108	40	63.88	-149.22
109	41	63.88	-149.22
111	45	64.87	-147.86
112	46	64.87	-147.75
113	49	68.07	-149.58
114	50	69.43	-148.67
115	51	64.95	-147.62
116	52	68.76	161.46
117	53	68.75	161.48
118	54	68.75	161.5
119	55	68.75	161.47
120	56	68.74	161.5
121	57	68.74	161.51
122	58	61.38	-135.66
123	59	60.09	-132.37
124	60	62.7	-116.14
125	61	62.46	-114.53
126	62	72.37	126.48
127	63	72.37	126.48
128	64	78.92	11.83
129	65	70.83	147.5
130	66	70.83	147.5
131	67	64.87	-111.58
132	68	64.88	-111.57
133	69	64.87	-111.68
134	70	64.7	-148.32
135	71	68.62	-149.3
136	72	68.62	-149.3
137	73	68.62	-149.3
138	74	64.7	-148.32
139	75	61.3	-121.3
140	76	69.82	27.17
141	77	68.88	21.08
142	78	70.23	-148.42
143	79	70.23	-148.42
144	80	70.23	-148.42
145	81	70.23	-148.42
146	82	70.23	-148.42
147	83	70.23	-148.42
148	84	70.23	-148.42
149	85	70.23	-148.43
150	86	70.23	-148.42
151	87	70.23	-148.42
152	88	70.23	-148.42
153	89	70.23	-148.42
154	90	70.23	-148.42
155	91	70.23	-148.42
156	92	70.23	-148.42
157	93	70.23	-148.42
158	94	70.23	-148.43
159	95	61.22	-138.28
160	96	61.22	-138.28
161	97	62.25	-121.57
162	98	62.12	-121.49
163	99	61.08	-117.79
164	100	59.48	-117.79
165	101	61.2	-120.08
166	102	77.49	-69.4
167	103	77.49	-69.37
168	104	74.48	-20.56
169	105	74.47	-20.55
170	106	68.31	161.35
171	107	68.62	-149.61
172	108	66.83	65.98
173	109	66.83	65.98
174	110	66.83	65.98
175	111	66.83	65.98
176	112	66.83	65.98
177	113	66.83	65.98
178	114	66.83	65.98
179	115	66.83	65.98
180	116	66.83	65.98
181	117	66.83	65.98
182	118	66.83	65.98
183	119	66.83	65.98
184	120	66.83	65.98
185	121	66.83	65.98
186	122	66.83	65.98
187	123	66.83	65.98
188	124	66.83	65.98
189	125	66.83	65.98
190	126	66.83	65.98
191	127	66.83	65.98
192	128	66.83	65.98
193	129	66.83	65.98
194	130	66.83	65.98
195	131	66.83	65.98
196	132	66.83	65.98
197	133	66.83	65.98
198	134	66.83	65.98
199	135	66.83	65.98
200	136	66.83	65.98
201	137	66.83	65.98
202	138	66.83	65.98
203	139	66.83	65.98
204	140	66.83	65.98
205	141	66.83	65.98
206	142	66.83	65.98
207	143	66.83	65.98
208	144	66.83	65.98
209	145	66.83	65.98
210	146	66.83	65.98
211	147	66.83	65.98
212	148	66.83	65.98
213	149	66.83	65.98
214	150	66.83	65.98
215	151	66.83	65.98
216	152	66.83	65.98
217	153	66.83	65.98
218	154	66.83	65.98
219	155	66.83	65.98
220	156	66.83	65.98
221	157	66.83	65.98
222	158	66.83	65.98
223	159	66.83	65.98
224	160	66.83	65.98
225	161	66.83	65.98
226	162	66.83	65.98
227	163	66.83	65.98
228	164	66.83	65.98
229	165	66.83	65.98
230	166	66.83	65.98
231	167	66.83	65.98
232	168	66.83	65.98
233	169	66.83	65.98
234	170	66.83	65.98
235	171	66.83	65.98
236	172	66.83	65.98
237	173	66.83	65.98
238	174	66.83	65.98
239	175	66.83	65.98
240	176	66.83	65.98
241	177	66.83	65.98
242	178	66.83	65.98
243	179	66.83	65.98
244	180	66.83	65.98
245	181	66.83	65.98
246	182	66.83	65.98
247	183	66.83	65.98
248	184	66.83	65.98
249	185	66.83	65.98
250	186	69.27	-53.46
251	187	69.27	-53.46
252	188	69.27	-53.46
253	189	69.27	-53.46
254	190	69.27	-53.46
255	191	69.27	-53.46
256	192	69.25	-53.51
257	193	64.87	-147.86
258	194	68.61	-149.31
259	195	68.61	-133.58
260	196	68.96	-133.84
261	197	69.12	-134.18
262	198	64.88	-147.68
263	199	64.88	-147.8
264	200	64.88	-147.68
265	201	71.28	-156.61
266	202	71.28	-156.61
267	203	71.28	-156.61
268	204	71.28	-156.61
269	205	71.28	-156.61
270	206	71.28	-156.61
271	207	71.28	-156.61
272	208	71.28	-156.6
273	209	71.28	-156.6
274	210	71.28	-156.6
275	211	71.28	-156.6
276	212	71.28	-156.6
277	213	71.28	-156.6
278	214	71.28	-156.6
279	215	71.28	-156.6
280	216	71.28	-156.6
281	217	71.28	-156.6
282	218	71.28	-156.6
283	219	71.28	-156.6
284	220	71.28	-156.6
285	221	71.28	-156.6
286	222	71.28	-156.6
287	223	71.28	-156.6
288	224	71.28	-156.6
289	225	66.61	-160.02
290	226	66.66	-160.12
291	227	66.66	-160.14
292	228	66.65	-160.15
293	229	66.5	-157.61
294	230	66.5	-157.61
295	231	66.5	-157.6
296	232	66.56	-159
297	233	66.56	-159
298	234	66.56	-159
299	235	64.86	-163.71

## Sheet: RussianHydromet
Station ID	WMO Index	Station Name	Latitude	Longitude	Elevation
300	20069	О.Визе	79.49	76.98	10
301	20087	О.Голомянный	79.55	90.61	8
302	20292	Им.Е.К.Федорова	77.71	104.29	15
303	20674	О.Диксон	73.51	80.41	46
304	21921	Кюсюр	70.68	127.4	33
305	22100	Верховье р.Лотты	68.53	28.91	115
306	22106	Падун	68.6	31.8	63
307	22213	Апатиты	67.55	33.35	134
308	22217	Кандалакша	67.17	32.35	25
309	22235	Краснощелье	67.35	37.05	157
310	22249	Каневка	67.13	39.66	151
311	22292	Индига	67.68	48.68	4
312	22349	Пялица	66.18	39.52	9
313	22408	Калевала	65.21	31.15	120
314	22438	Жижгин,остров	65.2	36.81	17
315	22471	Мезень	65.86	44.21	19
316	22550	Архангельск	64.5	40.73	8
317	22559	Холмогоры	64.21	41.66	12
318	22563	Пинега	64.7	43.38	31
319	22583	Койнас	64.75	47.65	64
320	22602	Реболы	63.83	30.81	182
321	22621	Сегежа	63.76	34.28	112
322	22641	Онега	63.9	38.11	13
323	22676	Сура	63.58	45.63	62
324	22721	Медвежьегорск	62.91	34.43	81
325	22768	Шенкурск	62.1	42.9	45
326	22778	Верхняя Тойма, АМСГ	62.23	45.01	58
327	22798	Яренск	62.16	49.11	92
328	22802	Сортавала	61.71	30.71	19
329	22820	Петрозаводск	61.82	34.27	111
330	22837	Вытегра	61.01	36.45	56
331	22845	Каргополь	61.51	38.93	126
332	22867	Вельск	61.08	42.06	91
333	22912	Олонец	60.98	32.98	12
334	22951	Коноша	60.9	40.3	227
335	22981	Великий Устюг	60.76	46.3	99
336	22983	Лальск	60.7	47.6	85
337	22996	Объячево	60.36	49.65	152
338	23078	Норильск (Тайм.ЦГМС)	69.35	88.26	65
339	23205	Нарьян-Мар	67.63	53.02	12
340	23207	Коткино	67.01	51.2	18
341	23219	Хоседа-Хард	67.08	59.38	84
342	23274	Игарка	67.46	86.56	31
343	23324	Петрунь	66.43	60.76	62
344	23383	Агата	66.88	93.46	278
345	23405	Усть-Цильма	65.43	52.26	68
346	23412	Усть-Уса	65.96	56.91	78
347	23418	Печора	65.13	57.14	59
348	23463	Янов Стан	65.98	84.26	40
349	23472	Туруханск	65.79	87.99	38
350	23518	Усть-Щугор	64.26	57.61	75
351	23527	Саранпауль	64.28	60.88	29
352	23552	Тарко-Сале	64.91	77.81	27
353	23578	Верещагино	64.23	87.46	30
354	23606	Ухта	63.55	53.81	137
355	23625	Сосьва	63.65	62.1	28
356	23631	Березово	63.93	65.05	32
357	23656	Халесовая	63.38	78.32	67
358	23662	Толька	63.98	82.08	33
359	23678	Верхнеимбатск	63.15	87.95	46
360	23711	Троицко-Печорское	62.7	56.2	139
361	23724	Няксимволь	62.43	60.86	51
362	23734	Октябрьское	62.45	66.05	72
363	23748	Когалым	62.18	74.48	66
364	23788	Кузьмовка	62.31	92.11	62
365	23804	Сыктывкар	61.68	50.78	119
366	23823	Воньеган	61.92	64.92	117
367	23847	Сытомино	61.3	71.3	33
368	23849	Сургут,АМСГ	61.25	73.5	56
369	23862	Корлики	61.53	82.4	80
370	23867	Ларьяк	61.1	80.25	57
371	23884	Бор	61.58	90.03	58
372	23891	Байкит	61.66	96.36	262
373	23921	Ивдель	60.68	60.45	94
374	23929	Шаим	60.31	64.21	53
375	23933	Ханты-Мансийск	61.03	69.12	44
376	23939	Алтай	60.33	68.97	32
377	23955	Александровское	60.43	77.87	49
378	23982	Вельмо	61.02	93.42	122
379	23986	Северо-Енисейский	60.38	93.33	519
380	23987	Ярцево	60.25	90.23	58
381	24125	Оленек	68.5	112.43	220
382	24136	Сухана	68.61	118.33	77
383	24143	Джарджан	68.73	124	39
384	24266	Верхоянск	67.57	133.4	136
385	24343	Жиганск	66.77	123.4	92
386	24382	Усть-Мома	66.45	143.23	196
387	24507	Тура	64.27	100.22	191
388	24606	Кислокан	63.58	103.96	211
389	24639	Нюрба	63.28	118.33	119
390	24641	Вилюйск	63.78	121.62	111
391	24652	Сангары, АМСГ	63.96	127.46	96
392	24688	Оймякон	63.25	143.15	740
393	24738	Сунтар	62.15	117.65	133
394	24768	Чурапча	62.03	132.6	186
395	24790	Сусуман	62.78	148.16	655
396	24802	Стрелка Чуня	61.75	102.8	358
397	24817	Ербогачен	61.26	108.01	291
398	24856	Покровск	61.48	129.15	115
399	24908	Ванавара	60.34	102.29	260
400	24923	Ленск	60.71	114.88	234
401	24944	Олекминск	60.4	120.42	230
402	24951	Исить	60.81	125.31	118
403	24959	Якутск	62.02	129.72	101
404	24962	Амга,АМСГ	60.9	131.98	146
405	24966	Усть-Мая	60.38	134.45	170
406	25138	Островное	68.11	164.16	94
407	25206	Среднеколымск	67.45	153.71	21
408	25400	Зырянка	65.73	150.9	43
409	25428	Омолон	65.23	160.53	260
410	25551	Марково	64.68	170.41	26
411	25705	Среднекан	62.45	152.31	260
412	25913	Магадан, Нагаева бухта	59.55	150.78	116
413	26063	Санкт-Петербург	59.97	30.3	6
414	26069	Белогорка	59.35	30.13	90
415	26094	Тихвин	59.65	33.55	61
416	26099	Ефимовская	59.5	34.7	176
417	26167	Николаевское	58.56	29.8	91
418	26258	Псков	57.81	28.41	45
419	26291	Боровичи	58.41	33.9	89
420	26298	Бологое	57.88	34.03	187
421	26359	Пушкинские Горы	57.01	28.9	108
422	26389	Осташков	57.13	33.11	218
423	26393	Вышний Волочек	57.55	34.56	169
424	26477	Великие Луки	56.35	30.62	103
425	26479	Торопец	56.48	31.63	186
426	26585	Белый	55.85	32.95	222
427	26781	Смоленск	54.75	32.07	238
428	26795	Спас-Деменск	54.41	34.01	238
429	26898	Брянск, АМСГ	53.25	34.31	216
430	27037	Вологда, Прилуки	59.32	39.93	130
431	27051	Тотьма	59.88	42.75	134
432	27066	Никольск	59.53	45.46	143
433	27113	Череповец	59.25	37.96	114
434	27164	Кологрив	58.82	44.32	151
435	27223	Пошехонье-Володарск	58.48	39.13	111
436	27296	Кумены	58.1	49.92	177
437	27329	Ростов	57.2	39.41	101
438	27333	Кострома	57.73	40.78	126
439	27369	Красные Баки	57.13	45.16	110
440	27373	Шахунья	57.66	46.63	175
441	27393	Нолинск	57.55	49.95	136
442	27402	Тверь	56.88	35.86	146
443	27428	Александров	56.4	38.75	185
444	27441	Шуя	56.85	41.4	98
445	27453	Городец (Волжск.ГМО)	56.68	43.43	103
446	27485	Йошкар-Ола	56.7	47.91	106
447	27509	Можайск	55.51	36	185
448	27523	Павловский Посад	55.76	38.68	135
449	27532	Владимир, АМСГ	56.11	40.35	172
450	27577	Сергач	55.53	45.5	125
451	27581	Чебоксары	56.08	47.33	163
452	27625	Коломна	55.13	38.73	114
453	27648	Елатьма	54.95	41.76	136
454	27653	Арзамас	55.36	43.78	127
455	27675	Порецкое	55.18	46.33	136
456	27707	Сухиничи	54.1	35.35	238
457	27719	Тула	54.23	37.61	203
458	27745	Сасово	54.35	41.96	115
459	27786	Ульяновск	54.31	48.33	129
460	27821	Узловая	54	38.13	231
461	27823	Павелец	53.78	39.25	209
462	27848	Моршанск	53.45	41.8	142
463	27857	Земетчино	53.48	42.63	131
464	27858	Пачелма	53.33	43.31	261
465	27906	Орел,АМСГ	52.93	36	196
466	27921	Ефремов	53.15	38.11	215
467	27928	Елец	52.63	38.51	168
468	27930	Липецк,АМСГ	52.7	39.51	177
469	27935	Мичуринск	52.88	40.48	158
470	27947	Тамбов	52.8	41.33	128
471	27962	Пенза,ГМО	53.12	45.02	172
472	27995	Безенчук	52.98	49.43	45
473	28044	Серов	59.6	60.53	130
474	28049	Гари	59.43	62.33	131
475	28064	Леуши	59.61	65.71	72
476	28076	Демьянское	59.6	69.28	57
477	28097	Таурово	59.58	73.28	59
478	28116	Кудымкар	58.98	54.65	186
479	28138	Бисер	58.51	58.85	463
480	28224	Пермь	58.01	56.3	171
481	28240	Нижний Тагил	57.88	60.06	260
482	28248	Алапаевск	57.86	61.7	130
483	28255	Туринск	58.05	63.68	103
484	28264	Тавда	58.05	65.26	60
485	28275	Тобольск	58.15	68.25	47
486	28302	Уни	57.75	51.5	183
487	28319	Ножовка	57.08	54.75	131
488	28346	Артемовский	57.36	61.91	154
489	28366	Ярково	57.42	67.08	52
490	28367	Тюмень	57.11	65.43	102
491	28383	Тевриз	57.51	72.4	67
492	28411	Ижевск	56.83	53.45	159
493	28418	Сарапул	56.46	53.73	133
494	28434	Красноуфимск	56.65	57.78	206
495	28445	Верхнее дуброво	56.73	61.07	288
496	28449	Каменск- Уральский	56.43	61.86	171
497	28456	Шатрово	56.51	64.65	114
498	28465	Ялуторовск	56.68	66.35	61
499	28481	Викулово	56.81	70.61	78
500	28491	Большие Уки	56.93	72.66	87
501	28493	Тара	56.9	74.38	73
502	28517	Мензелинск, АМСГ	55.71	53.06	112
503	28522	Аскино	56.08	56.58	207
504	28537	Дуван	55.7	57.9	338
505	28552	Шадринск	56.06	63.65	89
506	28573	Ишим	56.1	69.43	82
507	28586	Тюкалинск	55.86	72.2	118
508	28588	Называевск	55.56	71.36	126
509	28593	Большеречье	56.1	74.63	77
510	28598	Саргатское	55.6	73.48	81
511	28615	Бакалы	55.18	53.8	125
512	28630	Златоуст	55.2	59.66	538
513	28659	Куртамыш	54.91	64.43	158
514	28661	Курган, Вороновка	55.47	65.42	74
515	28666	Макушино	55.25	67.3	140
516	28688	Исилькуль	54.9	71.25	125
517	28696	Калачинск	55.03	74.58	110
518	28698	Омск,степная	55.01	73.38	122
519	28704	Чулпаново	54.5	50.41	78
520	28710	Раевский	54.08	54.91	120
521	28711	Бугульма	54.58	52.8	304
522	28786	Полтавка	54.36	71.75	125
523	28791	Шербакуль	54.63	72.43	115
524	28797	Одесское	54.2	72.96	125
525	28799	Черлак	54.16	74.8	115
526	28806	Бугуруслан	53.61	52.45	92
527	28825	Стерлитамак	53.58	56	137
528	28833	Верхнеуральск	53.88	59.2	403
529	28838	Магнитогорск	53.35	59.08	384
530	28941	Карталы	53.05	60.66	301
531	29023	Напас	59.85	81.95	76
532	29111	Средний Васюган	59.21	78.23	69
533	29128	Парабель	58.7	81.5	63
534	29149	Степановка	58.63	86.73	105
535	29231	Колпашево	58.32	82.95	75
536	29253	Лосиноборское	58.43	89.36	137
537	29263	Енисейск	58.45	92.2	79
538	29282	Богучаны	58.38	97.45	134
539	29313	Пудино	57.53	79.36	97
540	29328	Бакчар	57.08	81.91	110
541	29348	Первомайское	57.06	86.21	114
542	29374	Казачинское	57.68	93.28	94
543	29393	Червянка	57.65	99.53	220
544	29418	Северное	56.35	78.35	126
545	29430	Томск	56.5	84.91	139
546	29464	Большой Улуй	56.65	90.55	231
547	29467	Ачинск,ж.д.ст.	56.28	90.52	266
548	29481	Дзержинское	56.85	95.21	188
549	29498	Шиткино	56.35	98.36	221
550	29541	Тайга	56.06	85.61	251
551	29552	Тяжин	56.11	88.51	222
552	29553	Боготол	56.23	89.58	291
553	29558	Шарыпово	55.53	89.2	319
554	29563	Кача	56.11	92.2	479
555	29570	Красноярск, оп.п.	56.03	92.75	276
556	29576	Уяр	55.8	94.33	375
557	29578	Шалинское	55.72	93.75	399
558	29580	Солянка	56.17	95.27	343
559	29587	Ирбейское	55.63	95.46	252
560	29594	Тайшет	55.95	98	307
561	29605	Татарск	55.2	75.96	112
562	29612	Барабинск	55.35	78.31	120
563	29626	Коченево	55.03	82.18	159
564	29638	Огурцово	54.9	82.95	133
565	29645	Кемерово,АГРО	55.25	86.21	148
566	29653	Ужур,ст.ж.д.	55.3	89.81	387
567	29654	Центральный рудник	55.21	87.65	495
568	29662	Балахта	55.38	91.66	321
569	29664	Светлолобово	55.1	90.83	325
570	29676	Агинское	55.25	94.88	337
571	29698	Нижнеудинск	54.88	99.03	411
572	29706	Купино	54.36	77.28	115
573	29735	Посевная	54.3	83.38	293
574	29745	Белово	54.45	86.36	226
575	29756	Шира,ж.д.	54.5	89.93	475
576	29766	Идринское	54.36	92.13	282
577	29772	Артемовск	54.52	93.38	479
578	29816	Хабары	53.61	79.55	138
579	29822	Камень-на-Оби	53.81	81.26	129
580	29838	Барнаул	53.43	83.51	184
581	29849	Кузедеево	53.33	87.16	293
582	29862	Абакан (Хак. ЦГМС)	53.77	91.32	256
583	29866	Минусинск	53.7	91.7	254
584	29869	Ермаковское	53.3	92.41	298
585	29874	Каратузское	53.6	92.85	320
586	29894	Алыгджер	53.63	98.21	918
587	29915	Славгород	52.96	78.65	126
588	29923	Ребриха	53.06	82.3	219
589	29937	Алейская,ж.д.ст.	52.51	82.76	175
590	29939	Бийск- Зональная	52.68	84.95	228
591	29956	Таштып	52.8	89.91	455
592	29962	Бея	53.05	90.91	469
593	30054	Витим	59.45	112.58	190
594	30127	Токма	58.23	105.73	439
595	30157	Мама	58.31	112.86	224
596	30165	Светлый	58.42	116.02	421
597	30230	Киренск	57.77	108.07	259
598	30252	Мамакан	57.81	114.16	249
599	30309	Братск,обс.	56.28	101.75	416
600	30328	Орлинга	56.05	105.83	338
601	30337	Казачинское, АМСГ	56.31	107.61	362
602	30372	Чара	56.9	118.27	711
603	30385	Усть-Нюкжа	56.58	121.48	426
604	30405	Тангуй	55.38	101.03	423
605	30433	Нижнеангарск	55.78	109.55	487
606	30469	Калакан	55.11	116.76	613
607	30493	Нагорный	55.96	124.88	861
608	30504	Тулун	54.6	100.63	522
609	30521	Жигалово	54.8	105.21	426
610	30526	Тырка	54.48	107.07	651
611	30555	Троицкий прииск	54.61	113.13	1314
612	30603	Зима	53.93	102.05	458
613	30612	Балаганск	54	103.06	427
614	30618	Бохан	53.13	103.76	446
615	30627	Баяндай	53.1	105.53	762
616	30636	Баргузин	53.61	109.63	489
617	30637	Узур	53.32	107.73	460
618	30673	Могоча	53.75	119.73	625
619	30683	Ерофей Павлович	53.96	121.93	522
620	30692	Сковородино	54	123.96	398
621	30710	Иркутск,обс.	52.26	104.31	469
622	30712	Усолье- Сибирское	52.75	103.68	443
623	30715	Ангарск	52.48	103.85	437
624	30729	Кабанск	52.05	106.65	467
625	30731	Горячинск	52.98	108.28	487
626	30739	Хоринск	52.16	109.78	666
627	30745	Сосново-Озерское	52.53	111.55	952
628	30758	Чита	52.08	113.48	671
629	30768	Нерчинск,АМСГ	52	116.53	482
630	30772	Усть-Карск	52.7	118.8	407
631	30777	Сретенск	52.23	117.7	525
632	30811	Тунка	51.73	102.53	721
633	30822	Бабушкин	51.71	105.85	467
634	30823	Улан-Удэ,город	51.83	107.6	515
635	30846	Улеты	51.35	112.46	743
636	30859	Агинское	51.1	114.51	681
637	30874	Шелопугино	51.65	117.56	715
638	30879	Нерчинский з-д	51.31	119.61	619
639	30925	Кяхта	50.36	106.45	797
640	30935	Красный Чикой	50.37	108.75	771
641	30949	Кыра	49.56	111.96	908
642	30957	Акша	50.26	113.26	732
643	30965	Борзя	50.4	116.52	676
644	31088	Охотск	59.37	143.2	6
645	31168	Аян	56.45	138.15	8
646	31174	Большой Шантар	54.83	137.53	21
647	31253	Бомнак	54.71	128.93	357
648	31371	Черняево	52.78	126	210
649	31388	Норск	52.35	129.91	208
650	31416	Им.П.Осипенко	52.41	136.5	73
651	31439	Богородское	52.38	140.46	35
652	31442	Шимановск	51.98	127.65	281
653	31443	Мазаново	51.63	128.81	161
654	31445	Свободный	51.45	128.11	197
655	31510	Благовещенск	50.28	127.48	169
656	31513	Белогорск	50.91	128.46	178
657	31527	Завитая	50.11	129.46	241
658	31532	Чекунда	50.86	132.25	272
659	31561	Комсомольск-на-Амуре	50.53	137.03	22
660	31587	Поярково	49.61	128.65	115
661	31594	Архара	49.41	130.08	135
662	31707	Екатерино- Никольское	47.73	130.96	73
663	31725	Смидович	48.61	133.83	52
664	31733	Елабуга	48.81	135.88	58
665	31770	Советская Гавань	49	140.3	24
666	31786	Вяземская	47.55	134.81	89
667	31788	Лермонтовка	47.15	134.33	76
668	31792	Бичевая	47.76	135.63	105
669	31829	Золотой	47.31	138.98	26
670	31832	Бикин	46.8	134.26	68
671	31845	Красный Яр	46.53	135.31	130
672	31873	Дальнереченск	45.87	133.73	105
673	31884	Малиново	45.41	134.26	139
674	31915	Пограничный	44.4	131.38	211
675	31921	Астраханка	44.71	132.06	78
676	31931	Свиягино	44.8	133.08	99
677	31960	Владивосток,порт	43.11	131.93	183
678	31961	Тимирязевский	43.88	131.96	37
679	31969	Посьет	42.65	130.8	35
680	32061	Александровск- Сахал.	50.9	142.17	31
681	32071	Тымовское	50.73	142.71	95
682	32088	Углегорск	49.06	142.03	43
683	32099	Мыс Терпения	48.65	144.73	6
684	32128	Холмск	47.05	142.05	44
685	32150	Южно-Сахалинск	46.95	142.72	24
686	32165	Южно-Курильск	44.01	145.86	49
687	32213	Мыс Лопатка	50.86	156.68	47
688	32287	Усть-Хайрюзово	57.08	156.7	8
689	32389	Ключи	56.32	160.83	29
690	32408	Усть-Камчатск	56.21	162.71	27
691	32618	Никольское (О.Беринга)	55.2	165.98	18
692	34003	Поныри	52.31	36.3	251
693	34009	Курск,АЭ	51.77	36.17	247
694	34013	Ливны	52.43	37.6	179
695	34110	Богородицкое-Фенино	51.16	37.35	226
696	34123	Воронеж,АГРО	51.7	39.21	149
697	34139	Каменная степь	51.05	40.7	194
698	34163	Октябрьский Городок	51.63	45.45	201
699	34172	Саратов,цгмс	51.56	46.03	156
700	34186	Ершов	51.36	48.3	111
701	34214	Белгород, АМСГ	50.63	36.58	224
702	34240	Урюпинск	50.8	42	110
703	34262	Рудня	50.83	44.56	114
704	34321	Валуйки	50.21	38.1	112
705	34344	Казанская	49.8	41.15	72
706	34356	Фролово	49.8	43.66	119
707	34391	Александров Гай	50.15	48.55	25
708	34432	Чертково	49.38	40.16	145
709	34438	Миллерово	48.93	40.38	155
710	34476	Эльтон	49.13	46.85	6
711	34545	Морозовск	48.35	41.86	90
712	34578	Черный Яр	48.06	46.11	5
713	34579	Верхний Баскунчак	48.21	46.73	34
714	34646	Цимлянск	47.63	42.11	65
715	34655	Котельниково	47.63	43.15	49
716	34720	Таганрог	47.2	38.9	32
717	34731	Ростов-на-Дону,АМС	47.25	39.82	78
718	34740	Гигант	46.51	41.35	79
719	34743	Зимовники	47.15	42.48	72
720	34824	Приморско-Ахтарск	46.03	38.15	5
721	34838	Тихорецк	45.85	40.08	78
722	34861	Элиста,АМСГ	46.36	44.33	155
723	34866	Яшкуль	46.18	45.35	-7
724	34880	Астрахань,ГМО	46.28	48.05	-23
725	34887	Лиман	45.8	47.21	-18
726	34949	Ставрополь, АМСГ	45.11	42.08	452
727	34954	Светлоград	45.35	42.85	140
728	34964	Арзгир	45.4	44.2	76
729	35001	Большая Глушица	52.38	50.46	64
730	35026	Зилаир	52.21	57.4	521
731	35041	Бреды	52.43	60.35	310
732	35121	Оренбург,ЗГМО	51.68	55.1	118
733	36020	Родино	52.5	80.2	159
734	36034	Рубцовск	51.5	81.21	219
735	36038	Змеиногорск	51.15	82.2	355
736	36064	Яйлю	51.76	87.6	480
737	36091	Нижне- Усинское	52.27	93.02	662
738	36096	Кызыл (Тув. ЦГМС)	51.71	94.49	632
739	36103	Тоора-Хем	52.46	96.1	920
740	36229	Усть-Кокса	50.28	85.61	978
741	36231	Онгудай	50.75	86.13	833
742	36259	Кош-Агач	50.01	88.68	1759
743	36307	Эрзин	50.26	95.11	1101
744	37021	Майкоп	44.61	40.08	220
745	37061	Буденновск	44.78	44.13	136
746	37099	Сочи,ГМО	43.58	39.76	34
747	37126	Шаджатмаз	43.73	42.66	2056
748	37145	Моздок	43.73	44.66	136
749	37163	Кизляр,АМСГ	43.83	46.71	-5
750	37193	Теберда	43.45	41.73	1325
751	37212	Нальчик	43.53	43.63	425
752	37235	Грозный,АМСГ	43.35	45.68	163
753	37248	Хасавюрт	43.25	46.58	117
754	37470	Дербент	42.06	48.3	-18
755	37472	Махачкала	43.01	47.48	9
756	37597	Касумкент	41.66	48.15	477
757	37663	Ахты	41.46	47.75	1015

## Sheet: Nordicana
Station ID	Site Name	Lat (oN)	Lon (oE)	Citation
758	AKUL162	60.8174	-78.155	Allard, M., Sarrazin, D., L’Hérault, E. 2020. Borehole and near-surface ground temperatures in northeastern Canada, v. 1.5 (1988-2019). Nordicana D8, doi: 10.5885/45291SL-34F28A9491014AFD.
759	AUPA299	59.2993	-69.5996	Allard, M., Sarrazin, D., L’Hérault, E. 2020. Borehole and near-surface ground temperatures in northeastern Canada, v. 1.5 (1988-2019). Nordicana D8, doi: 10.5885/45291SL-34F28A9491014AFD.
760	BISCARA	57.1702	-76.5825	CEN 2020. Climate station data from the Biscarat river region in Nunavik, Quebec, Canada, v. 1.0 (2005-2019). Nordicana D62, doi: 10.5885/45495SL-78FA5A95C5FB4D
761	BONFORE	57.7282	-76.0845	CEN 2020. Environmental data from Boniface river region in Nunavik, Quebec, Canada, v. 1.3 (1988-2019). Nordicana D7, doi: 10.5885/45129SL-DBDA2A77C0094963.
762	BYLOTPB	73.1563	-79.9855	Allard, M., Sarrazin, D., L’Hérault, E. 2020. Borehole and near-surface ground temperatures in northeastern Canada, v. 1.5 (1988-2019). Nordicana D8, doi: 10.5885/45291SL-34F28A9491014AFD.
763	BYLOTPD	73.1503	-80.0049	Allard, M., Sarrazin, D., L’Hérault, E. 2020. Borehole and near-surface ground temperatures in northeastern Canada, v. 1.5 (1988-2019). Nordicana D8, doi: 10.5885/45291SL-34F28A9491014AFD.
764	BYLOTPP	73.1555	-79.9585	Allard, M., Sarrazin, D., L’Hérault, E. 2020. Borehole and near-surface ground temperatures in northeastern Canada, v. 1.5 (1988-2019). Nordicana D8, doi: 10.5885/45291SL-34F28A9491014AFD.
765	ELLACC1	82.8466	-78.1316	CEN 2020. Climate station data from Northern Ellesmere Island in Nunavut, Canada, v. 1.7 (2002-2019). Nordicana D1, doi: 10.5885/44985SL-8F203FD3ACCD4138.
766	ELLEPAR	83.094	-74.1629	CEN 2020. Climate station data from Northern Ellesmere Island in Nunavut, Canada, v. 1.7 (2002-2019). Nordicana D1, doi: 10.5885/44985SL-8F203FD3ACCD4138.
767	ELLLACA	83.0023	-75.3896	CEN 2020. Climate station data from Northern Ellesmere Island in Nunavut, Canada, v. 1.7 (2002-2019). Nordicana D1, doi: 10.5885/44985SL-8F203FD3ACCD4138.
768	IQAV2TC	63.7542	-68.5464	Allard, M., Sarrazin, D., L’Hérault, E. 2020. Borehole and near-surface ground temperatures in northeastern Canada, v. 1.5 (1988-2019). Nordicana D8, doi: 10.5885/45291SL-34F28A9491014AFD.
769	IQAV3HO	63.747	-68.5218	Allard, M., Sarrazin, D., L’Hérault, E. 2020. Borehole and near-surface ground temperatures in northeastern Canada, v. 1.5 (1988-2019). Nordicana D8, doi: 10.5885/45291SL-34F28A9491014AFD.
770	IQAV4TC	63.7479	-68.5517	Allard, M., Sarrazin, D., L’Hérault, E. 2020. Borehole and near-surface ground temperatures in northeastern Canada, v. 1.5 (1988-2019). Nordicana D8, doi: 10.5885/45291SL-34F28A9491014AFD.
771	KANGCRE	58.6944	-65.9385	Allard, M., Sarrazin, D., L’Hérault, E. 2020. Borehole and near-surface ground temperatures in northeastern Canada, v. 1.5 (1988-2019). Nordicana D8, doi: 10.5885/45291SL-34F28A9491014AFD.
772	KANGTMA	58.7167	-65.9667	Allard, M., Sarrazin, D., L’Hérault, E. 2020. Borehole and near-surface ground temperatures in northeastern Canada, v. 1.5 (1988-2019). Nordicana D8, doi: 10.5885/45291SL-34F28A9491014AFD.
773	KJRAPIK	55.2764	-77.7463	CEN 2020. Climate station data from Whapmagoostui-Kuujjuarapik Region in Nunavik, Quebec, Canada, v. 1.5 (1987-2019). Nordicana D4, doi: 10.5885/45057SL-EADE4434146946A7.
774	LECESIL	56.3593	-74.5107	CEN 2020. Climate station data from the Clearwater lake region in Nunavik, Quebec, Canada, v. 1.1 (1986-2019). Nordicana D57, doi: 10.5885/45475SL-5A33FE09B0494D92.
775	LECPSIL	56.3389	-74.4677	CEN 2020. Climate station data from the Clearwater lake region in Nunavik, Quebec, Canada, v. 1.1 (1986-2019). Nordicana D57, doi: 10.5885/45475SL-5A33FE09B0494D92.
776	LECTOUR	56.2059	-74.4906	CEN 2020. Climate station data from the Clearwater lake region in Nunavik, Quebec, Canada, v. 1.1 (1986-2019). Nordicana D57, doi: 10.5885/45475SL-5A33FE09B0494D92.
777	PAN01TC	66.1505	-65.6881	Allard, M., Sarrazin, D., L’Hérault, E. 2020. Borehole and near-surface ground temperatures in northeastern Canada, v. 1.5 (1988-2019). Nordicana D8, doi: 10.5885/45291SL-34F28A9491014AFD.
778	PAN14TC	66.1447	-65.7071	Allard, M., Sarrazin, D., L’Hérault, E. 2020. Borehole and near-surface ground temperatures in northeastern Canada, v. 1.5 (1988-2019). Nordicana D8, doi: 10.5885/45291SL-34F28A9491014AFD.
779	PAN14TC	66.1442	-65.7207	Allard, M., Sarrazin, D., L’Hérault, E. 2020. Borehole and near-surface ground temperatures in northeastern Canada, v. 1.5 (1988-2019). Nordicana D8, doi: 10.5885/45291SL-34F28A9491014AFD.
780	PBAFORE	55.8712	-76.1607	CEN 2020. Climate station data from the Little Whale River region in Nunavik, Quebec, Canada, v. 1.1 (1993-2019). Nordicana D58, doi: 10.5885/45485SL-78F4F9C368364100.
781	PUVIREF	60.0567	-77.287	Allard, M., Sarrazin, D., L’Hérault, E. 2020. Borehole and near-surface ground temperatures in northeastern Canada, v. 1.5 (1988-2019). Nordicana D8, doi: 10.5885/45291SL-34F28A9491014AFD.
782	QUAQ156	61.0441	-69.614	Allard, M., Sarrazin, D., L’Hérault, E. 2020. Borehole and near-surface ground temperatures in northeastern Canada, v. 1.5 (1988-2019). Nordicana D8, doi: 10.5885/45291SL-34F28A9491014AFD.
783	SHELDRA	56.6141	-76.0909	CEN 2020. Climate station data from the Sheldrake river region in Nunavik, Quebec, Canada, v. 1.1 (1986-2019). Nordicana D61, doi: 10.5885/45480SL-C89DEB92A4FE4536.
784	SHELDRB	56.6141	-76.0909	CEN 2020. Climate station data from the Sheldrake river region in Nunavik, Quebec, Canada, v. 1.1 (1986-2019). Nordicana D61, doi: 10.5885/45480SL-C89DEB92A4FE4536.
785	TSJQ157	58.7	-69.9167	Allard, M., Sarrazin, D., L’Hérault, E. 2020. Borehole and near-surface ground temperatures in northeastern Canada, v. 1.5 (1988-2019). Nordicana D8, doi: 10.5885/45291SL-34F28A9491014AFD.
786	TSJQ304	58.6699	-69.9522	Allard, M., Sarrazin, D., L’Hérault, E. 2020. Borehole and near-surface ground temperatures in northeastern Canada, v. 1.5 (1988-2019). Nordicana D8, doi: 10.5885/45291SL-34F28A9491014AFD.
787	UMIROCA	56.5421	-76.5216	Allard, M., Sarrazin, D., L’Hérault, E. 2020. Borehole and near-surface ground temperatures in northeastern Canada, v. 1.5 (1988-2019). Nordicana D8, doi: 10.5885/45291SL-34F28A9491014AFD.
788	WARDHIB	83.0914	-74.1328	CEN 2020. Climate station data from Northern Ellesmere Island in Nunavut, Canada, v. 1.7 (2002-2019). Nordicana D1, doi: 10.5885/44985SL-8F203FD3ACCD4138.
1340	RIMPES1	48.3234	-68.523	Arsenault, D., Vézina, F., Sirois, L., Buffin-Bélanger, T., and Hétu, B.: Climate station data from Macpès research forest in the Rimouski area, Quebec, Canada, v. 1.2 (2006-2017), 2018.
1341	IMMATS2 (Loc A)	56.5589	-76.4808	Fortier, R.: Réseau Immatsiak de surveillance des eaux souterraines dans la région d’Umiujaq au Nunavik, Québec, Canada, v. 1.4 (2012-2019)., 2020.
1342	IMMATS2 (Loc B)	56.5589	-76.4808	Fortier, R.: Réseau Immatsiak de surveillance des eaux souterraines dans la région d’Umiujaq au Nunavik, Québec, Canada, v. 1.4 (2012-2019)., 2020.

## Sheet: NWT-2017-009
Station ID	Site Name	Lat (oN)	Lon (oE)
896	DR_2_Therm	67.2466	-135.178
897	DR_3_Therm	67.2448	-135.203
898	DR_4_Therm	67.2363	-135.37
899	DR_5_Therm	67.2471	-135.195
900	DST	67.2436	-135.337
901	DST_DC	67.2436	-135.337
902	DST_DC_2	67.2418	-135.323
903	DST_HE_1	67.2409	-135.328
904	DST_HE_1_DC	67.2409	135.328
905	DST_HE_2	67.2409	-135.328
906	DST_HE_2_DC	67.2409	-135.328
907	DST_HE_3	67.2412	-135.309
908	DST_HE_3_DC	67.2412	-135.309
909	DST_HT_1	67.1888	-135.684
910	DST_HT_2	67.1888	-135.684
911	DST_HT_3	67.1888	-135.684
912	DST_HT_4	67.1888	135.684
913	DST_Peatland	67.2436	-135.337
914	DST_SF_1	67.2413	-135.318
915	DST_SF_2	67.2413	-135.318
916	DST_SF_3	67.2413	-135.318
917	DST_WT	67.243	-135.298
918	DST_WT_Control	67.243	-135.298
919	DST_WT_DC	67.24	-135.327
920	Dwarf_Therm_1	67.2446	-135.246
921	Dwarf_Therm_2	67.2353	-135.236
922	Dwarf_Therm_3	67.2469	-135.29
923	Dwarf_Therm_4	67.2367	-135.302
924	Dwarf_Therm_5	67.2334	-135.357
925	LSF	67.4537	-134.8
926	LSF_DC	67.4537	-134.8
927	New_Dwarf_1_Therm	67.1991	-135.658
928	Old_DR_5_Therm_1	67.2409	-135.317
929	Old_DR_5_Therm_2	67.2408	-135.317
930	Shrub_Therm_1	67.2446	-135.236
931	Shrub_Therm_2	67.2344	-135.228
932	Shrub_Therm_3	67.2454	-135.258
933	Shrub_Therm_4	67.2365	-135.281
934	Shrub_Therm_5	67.2452	-135.328
935	Shrub_Therm_6	67.2498	-135.361
936	Spruce_Therm_1	67.2419	-135.175
937	Spruce_Therm_2	67.2402	-135.203
938	Spruce_Therm_3	67.2523	-135.191
939	Spruce_Therm_4	67.2303	-135.387
940	Spruce_Therm_5	67.2396	-135.185
941	Spruce_Therm_6	67.2548	-135.201
942	Spruce_Therm_7	67.2347	-135.205
943	Spruce_Therm_8	67.2385	-135.193
944	Spruce_Therm_9	67.235	-135.217
945	SR_1_Therm	67.2521	-135.133
946	SR_2_Therm	67.2458	-135.169
947	SR_3_Therm	67.2398	-135.243
948	SR_4_Therm	67.2399	-135.335
949	SR_5_Therm	67.2399	-135.335
950	SR_6_Therm	67.2399	-135.235
951	TST	67.2583	-135.117
952	TST_DC	67.2583	-135.117
953	TST_DC_2	67.2582	-135.111
954	TST_HE1_DC	67.2557	-135.119
955	TST_HE_1	67.2557	-135.119
956	TST_HE_2	67.2459	-135.162
957	TST_HE_2_DC	67.2459	-135.162
958	TST_Peatland	67.259	-135.118
959	TST_WT_1	67.2589	-135.097
960	TST_WT_2	67.2589	-135.097
961	TST_WT_DC	67.2598	-135.105
962	USF	67.2703	-135.064
963	USF_DC	67.2703	-135.064
964	USF_HE_1	67.2723	-135.067
965	USF_HE_2	67.2723	-135.067
966	USF_WT_1	67.2664	-135.074
967	USF_WT_2	67.2664	-135.074
968	USF_WT_DC	67.2695	-135.071

## Sheet: NWT-2018-009
Station ID	Site Name	Lat (oN)	Lon (oE)
969	Bushloggers_BS01Daily	64.5921	-110.187
970	Bushloggers_BS02Daily	64.5921	-110.187
971	Bushloggers_BS03Daily	64.5924	-110.187
972	Bushloggers_BS04Daily	64.5924	-110.187
973	NGO-DD-1004_ST01Daily	64.5951	-110.238
974	NGO-DD-1004_ST02Daily	64.5951	-110.238
975	NGO-DD-1004_ST03Daily	64.5952	-110.238
976	NGO-DD-1004_ST04Daily	64.5951	-110.238
977	NGO-DD-1004Daily	64.5951	-110.238
978	NGO-DD-1005_ST01Daily	64.5999	-110.236
979	NGO-DD-1005_ST02Daily	64.5999	-110.236
980	NGO-DD-1005_ST03Daily	64.5999	-110.236
981	NGO-DD-1005_ST04Daily	64.5999	-110.235
982	NGO-DD-1005Daily	64.5999	-110.236
983	NGO-DD-1006Daily	64.6037	-110.233
984	NGO-DD-1007Daily	64.6037	-110.233
985	NGO-DD-1009_ST01Daily	64.7015	-110.443
986	NGO-DD-1009_ST02Daily	64.7015	-110.443
987	NGO-DD-1009_ST03Daily	64.7015	-110.443
988	NGO-DD-1009_ST04Daily	64.7016	-110.443
989	NGO-DD-1009Daily	64.7015	-110.443
990	NGO-DD-1010_ST01Daily	64.7028	-110.44
991	NGO-DD-1010_ST02Daily	64.7028	-110.44
992	NGO-DD-1010_ST03Daily	64.7027	-110.44
993	NGO-DD-1010_ST04Daily	64.7027	-110.44
994	NGO-DD-1010Daily	64.7028	-110.44
995	NGO-DD-1011_ST01Daily	64.7126	-110.441
996	NGO-DD-1011_ST02Daily	64.7126	-110.441
997	NGO-DD-1011_ST03Daily	64.7127	-110.441
998	NGO-DD-1011_ST04Daily	64.7127	-110.441
999	NGO-DD-1012_ST01Daily	64.7139	-110.443
1000	NGO-DD-1012_ST02Daily	64.7139	-110.443
1001	NGO-DD-1012_ST03Daily	64.7138	-110.443
1002	NGO-DD-1012_ST04Daily	64.7138	-110.443
1003	NGO-DD-1012Daily	64.7138	-110.443
1004	NGO-DD-2004_ST01Daily	64.5963	-110.237
1005	NGO-DD-2004_ST02Daily	64.5964	-110.237
1006	NGO-DD-2004_ST03Daily	64.5963	-110.236
1007	NGO-DD-2004_ST04Daily	64.5963	-110.236
1008	NGO-DD-2004Daily	64.5963	-110.237
1009	NGO-DD-2005_ST01Daily	64.5966	-110.233
1010	NGO-DD-2005_ST02Daily	64.5967	-110.233
1011	NGO-DD-2005_ST03Daily	64.5967	-110.233
1012	NGO-DD-2005_ST04Daily	64.5966	-110.233
1013	NGO-DD-2006_ST01Daily	64.5968	-110.231
1014	NGO-DD-2006_ST02Daily	64.5969	-110.231
1015	NGO-DD-2006_ST03Daily	64.5969	-110.231
1016	NGO-DD-2006_ST04Daily	64.5969	-110.231
1017	NGO-DD-2007_ST01Daily	64.5985	-110.235
1018	NGO-DD-2007_ST02Daily	64.5985	-110.236
1019	NGO-DD-2007_ST03Daily	64.5985	-110.236
1020	NGO-DD-2007_ST04Daily	64.5984	-110.236
1021	NGO-DD-2007Daily	64.5985	-110.236
1022	NGO-DD-2008_ST01Daily	64.6003	-110.185
1023	NGO-DD-2008_ST02Daily	64.6003	-110.185
1024	NGO-DD-2008_ST03Daily	64.6004	-110.185
1025	NGO-DD-2008_ST04Daily	64.6003	-110.185
1026	NGO-DD-2008Daily	64.6003	-110.185
1027	NGO-DD-2009_ST01Daily	64.6041	-110.217
1028	NGO-DD-2009_ST02Daily	64.6042	-110.217
1029	NGO-DD-2009_ST03Daily	64.6041	-110.217
1030	NGO-DD-2009_ST04Daily	64.6041	-110.217
1031	NGO-DD-2011_ST01Daily	64.7024	-110.448
1032	NGO-DD-2011_ST02Daily	64.7024	-110.448
1033	NGO-DD-2011_ST03Daily	64.7024	-110.448
1034	NGO-DD-2011_ST04Daily	64.7024	-110.448
1035	NGO-DD-2011Daily	64.7024	-110.448
1036	NGO-DD-2012_ST01Daily	64.7021	-110.446
1037	NGO-DD-2012_ST02Daily	64.7022	-110.446
1038	NGO-DD-2012_ST03Daily	64.7021	-110.446
1039	NGO-DD-2012_ST04Daily	64.7021	-110.446
1040	NGO-DD-2012Daily	64.7021	-110.446
1041	NGO-DD-2013_ST01Daily	64.7027	-110.45
1042	NGO-DD-2013_ST02Daily	64.7028	-110.45
1043	NGO-DD-2013_ST03Daily	64.7028	-110.45
1044	NGO-DD-2013_ST04Daily	64.7027	-110.45
1045	NGO-DD-2013Daily	64.7028	-110.45
1046	NGO-DD-2014_ST01Daily	64.7013	-110.439
1047	NGO-DD-2014_ST02Daily	64.7013	-110.439
1048	NGO-DD-2014_ST03Daily	64.7013	-110.439
1049	NGO-DD-2014_ST04Daily	64.7014	-110.439
1050	NGO-DD-2015_ST01Daily	64.7035	-110.442
1051	NGO-DD-2015_ST02Daily	64.7036	-110.442
1052	NGO-DD-2015_ST03Daily	64.7036	-110.442
1053	NGO-DD-2015_ST04Daily	64.7035	-110.442
1054	NGO-DD-2016_ST01Daily	64.7046	-110.444
1055	NGO-DD-2016_ST02Daily	64.7046	-110.444
1056	NGO-DD-2016_ST03Daily	64.7045	-110.444
1057	NGO-DD-2016_ST04Daily	64.7045	-110.444
1058	NGO-DD-2016Daily	64.7045	-110.444
1059	NGO-DD-2018_ST01Daily	64.7136	-110.436
1060	NGO-DD-2018_ST02Daily	64.7136	-110.436
1061	NGO-DD-2018_ST03Daily	64.7135	-110.436
1062	NGO-DD-2018_ST04Daily	64.7136	-110.436
1063	NGO-DD-2018Daily	64.7136	-110.436
1064	NGO-DD-2019_ST01Daily	64.7022	-110.436
1065	NGO-DD-2019_ST02Daily	64.7021	-110.436
1066	NGO-DD-2019_ST03Daily	64.7021	-110.436
1067	NGO-DD-2019_ST04Daily	64.7021	-110.436
1068	NGO-DD-2019Daily	64.7021	-110.436
1069	NGO-DD-2020_ST01Daily	64.7299	-110.403
1070	NGO-DD-2020_ST02Daily	64.7298	-110.403
1071	NGO-DD-2020_ST03Daily	64.7298	-110.402
1072	NGO-DD-2020_ST04Daily	64.7298	-110.403
1073	NGO-DD-2020Daily	64.7298	-110.403
1074	NGO-DD-2023_ST01Daily	64.8208	-110.421
1075	NGO-DD-2023_ST02Daily	64.8208	-110.421
1076	NGO-DD-2023_ST03Daily	64.8208	-110.421
1077	NGO-DD-2023_ST04Daily	64.8207	-110.421
1078	NGO-DD-2023Daily	64.8207	-110.421
1079	NGO-DD-2026_ST01Daily	64.7246	-110.345
1080	NGO-DD-2026_ST02Daily	64.7246	-110.345
1081	NGO-DD-2026_ST03Daily	64.7246	-110.345
1082	NGO-DD-2026_ST04Daily	64.7245	-110.345
1083	NGO-DD-2026Daily	64.7246	-110.345
1084	NGO-DD-2028Daily	64.6003	-110.185
1085	NGO-DD-2029_ST01Daily	64.6001	-110.185
1086	NGO-DD-2029_ST03Daily	64.6002	-110.184
1087	NGO-DD-2029_ST04Daily	64.6002	-110.185
1088	NGO-DD-2029Daily	64.6001	-110.185
1089	NGO-DD-2030_ST01Daily	64.853	-110.47
1090	NGO-DD-2030_ST02Daily	64.8531	-110.47
1091	NGO-DD-2030_ST03Daily	64.853	-110.47
1092	NGO-DD-2030_ST04Daily	64.8531	-110.47
1093	NGO-DD-2030Daily	64.853	-110.47
1094	NGO-DD-2032_ST01Daily	64.6293	-110.548
1095	NGO-DD-2032_ST02Daily	64.6293	-110.548
1096	NGO-DD-2032_ST03Daily	64.6292	-110.548
1097	NGO-DD-2032_ST04Daily	64.6292	-110.548
1098	NGO-DD-2032Daily	64.6293	-110.548
1099	NGO-DD-2033_ST01Daily	64.6055	-110.215
1100	NGO-DD-2033_ST02Daily	64.6055	-110.215
1101	NGO-DD-2033_ST03Daily	64.6055	-110.215
1102	NGO-DD-2033_ST04Daily	64.6054	-110.215
1103	NGO-DD-2033Daily	64.6054	-110.215
1104	NGO-DD-2034_ST01Daily	64.6048	-110.212
1105	NGO-DD-2034_ST02Daily	64.6048	-110.212
1106	NGO-DD-2034_ST03Daily	64.6048	-110.212
1107	NGO-DD-2034_ST04Daily	64.6048	-110.212
1108	NGO-DD-2034Daily	64.6048	-110.212
1109	NGO-DD-2035_ST01Daily	64.5999	-110.234
1110	NGO-DD-2035_ST02Daily	64.6	-110.234
1111	NGO-DD-2035_ST03Daily	64.5999	-110.234
1112	NGO-DD-2035_ST04Daily	64.5999	-110.234
1113	NGO-DD-2035Daily	64.5999	-110.234
1114	NGO-GU-1014_ST01Daily	64.7163	-110.442
1115	NGO-GU-1014_ST02Daily	64.7163	-110.442
1116	NGO-GU-1014_ST03Daily	64.7163	-110.442
1117	NGO-GU-1014_ST04Daily	64.7163	-110.442
1118	NGO-RC-162_ST01Daily	64.7527	-110.447
1119	NGO-RC-162_ST02Daily	64.7527	-110.447
1120	NGO-RC-162_ST03Daily	64.7527	-110.447
1121	NGO-RC-162_ST04Daily	64.7527	-110.447
1122	NGO-RC-162Daily	64.7527	-110.447
1123	NGO-RC-163_ST01Daily	64.7224	-110.501
1124	NGO-RC-163_ST02Daily	64.7224	-110.501
1125	NGO-RC-163_ST03Daily	64.7224	-110.501
1126	NGO-RC-163_ST04Daily	64.7224	-110.501
1127	NGO-RC-163Daily	64.7224	-110.501
1128	NGO-RC-164_ST01Daily	64.7222	-110.347
1129	NGO-RC-164_ST02Daily	64.7222	-110.348
1130	NGO-RC-164_ST03Daily	64.7222	-110.348
1131	NGO-RC-164_ST04Daily	64.7221	-110.348
1132	NGO-RC-164Daily	64.7222	-110.348
1133	NGO-RC-165_ST01Daily	64.7216	-110.348
1134	NGO-RC-165_ST02Daily	64.7216	-110.348
1135	NGO-RC-165_ST03Daily	64.7216	-110.348
1136	NGO-RC-165_ST04Daily	64.7216	-110.348
1137	NGO-RC-165Daily	64.7216	-110.348
1138	NGO-RC-166_ST01Daily	64.6346	-110.26
1139	NGO-RC-166_ST02Daily	64.6346	-110.26
1140	NGO-RC-166_ST03Daily	64.6346	-110.26
1141	NGO-RC-166_ST04Daily	64.6346	-110.26
1142	NGO-RC-166Daily	64.6346	-110.26
1143	NGO-RC-167_ST01Daily	64.6347	-110.257
1144	NGO-RC-167_ST02Daily	64.6347	-110.257
1145	NGO-RC-167_ST03Daily	64.6347	-110.257
1146	NGO-RC-167_ST04Daily	64.6346	-110.257
1147	NGO-RC-167Daily	64.6347	-110.257
1148	NGO-RC-168_ST01Daily	64.6411	-110.221
1149	NGO-RC-168_ST02Daily	64.6412	-110.221
1150	NGO-RC-168_ST03Daily	64.6412	-110.221
1151	NGO-RC-168_ST04Daily	64.6412	-110.221
1152	NGO-RC-168Daily	64.6411	-110.221
1153	NGO-RC-169_ST01Daily	64.6037	-110.233
1154	NGO-RC-169_ST02Daily	64.6036	-110.233
1155	NGO-RC-169_ST03Daily	64.6036	-110.233
1156	NGO-RC-169_ST04Daily	64.6037	-110.233
1157	NGO-RC-169_ST05Daily	64.6037	-110.233
1158	NGO-RC-169Daily	64.6037	-110.233
1159	NGO-RC-170_ST01Daily	64.5918	-110.19
1160	NGO-RC-170_ST02Daily	64.5917	-110.19
1161	NGO-RC-170_ST03Daily	64.5918	-110.19
1162	NGO-RC-170_ST04Daily	64.5918	-110.19
1163	NGO-RC-170Daily	64.5918	-110.19
1164	NGO-RC-171_ST01Daily	64.5915	-110.188
1165	NGO-RC-171_ST02Daily	64.5916	-110.188
1166	NGO-RC-171_ST03Daily	64.5917	-110.188
1167	NGO-RC-171_ST04Daily	64.5916	-110.188
1168	NGO-RC-171Daily	64.5916	-110.188
1169	NGO-RC-172_ST01Daily	64.6656	-109.677
1170	NGO-RC-172_ST02Daily	64.6656	-109.677
1171	NGO-RC-172_ST03Daily	64.6656	-109.677
1172	NGO-RC-172_ST04Daily	64.6656	-109.677
1173	NGO-RC-172Daily	64.6656	-109.677
1174	ROCKT1ADaily	64.7002	-110.434
1175	ROCKT1BDaily	64.7002	-110.434
1176	ROCKT1CDaily	64.7002	-110.434
1177	ROCKT2ADaily	64.6996	-110.431
1178	ROCKT2BDaily	64.6996	-110.431
1179	ROCKT2CDaily	64.6996	-110.431
1180	ROCKT3ADaily	64.7013	-110.435
1181	ROCKT3BDaily	64.7014	-110.435
1182	ROCKT3CDaily	64.7014	-110.435

## Sheet: NWT-2019-004
Station ID	Site Name	Lat (oN)	Lon (oE)
1183	AH48_9C	68.8155	-133.551
1184	Cr3N	68.4398	-133.765
1185	Cr4S	68.4473	-133.763
1186	Cr18S	68.6323	-133.652
1187	Cr21N	68.6392	-133.605
1188	Cr30a3	68.8683	-133.539
1189	Cr31N	68.9411	-133.419
1190	Cr35aN	69.0773	-133.102
1191	Cr35aS	69.077	-133.103

## Sheet: NWT-2019-017
Station ID	Site Name	Lat (oN)	Lon (oE)
1192	177_Pit_NTGS11	68.5384	-133.773
1193	177_Pit_NTGS11_SGT	68.5384	-133.773
1194	177_Pond_NTGS12	68.5384	-133.773
1195	177_Pond_NTGS12_SGT	68.5384	-133.773
1196	312_Pit_NTGS13	68.5384	-133.773
1197	312_Pit_NTGS13_SGT	68.5384	-133.773
1198	1401A_Pit_NTGS15	68.5384	-133.773
1199	HUS_H_NTGS7	69.0188	-133.275
1200	HUS_H_NTGS7_SGT	69.0188	-133.275
1201	HUS_P_NTGS8	69.0126	-133.271
1202	HUS_P_NTGS8_SGT	69.0126	-133.271
1203	HUS_R_NTGS9	69.0144	-133.281
1204	HUS_R_NTGS9_SGT	69.0144	-133.281
1205	HUS_Slump_NTGS17	68.5384	-133.773
1206	HUS_Slump_NTGS17_SGT	68.5384	-133.773
1207	I401A_Pit_NTGS15_SGT	68.5384	-133.773
1208	I401A_Upper_NTGS16	68.5384	-133.773
1209	I401A_Upper_NTGS16_SGT	68.5384	-133.773
1210	INU_H_NTGS2	68.5379	-133.762
1211	INU_H_NTGS2_SGT	68.5379	-133.762
1212	INU_P_NTGS1	68.5384	-133.773
1213	INU_P_NTGS1_SGT	68.5384	-133.773
1214	INU_R_NTGS3	68.5343	-133.764
1215	INU_R_NTGS3_SGT	68.5343	-133.764
1216	TUK_H_NTGS10	68.5384	-133.773
1217	TUK_H_NTGS10_SGT	68.5384	-133.773
1218	TVC_H_NTGS5	68.7521	-133.541
1219	TVC_H_NTGS5_SGT	68.7521	-133.541
1220	TVC_P_NTGS4	68.7494	-133.542
1221	TVC_P_NTGS4_SGT	68.7494	-133.542
1222	TVC_R_NTGS6_SGT	68.7591	-133.545

## Sheet: Street_2016
Station ID	Site Name	Lat (oN)	Lon (oE)
1223	TVC_logger_1_sedge	68.7446	-133.502
1224	TVC_logger_2_riparian	68.7453	-133.494
1225	TVC_logger_3_betula	68.7453	-133.494
1226	TVC_logger_4_alder	68.7452	-133.502
1227	TVC_logger_5_lichen_heath	68.7455	-133.497

[truncated: 8 more sheets: Yukon, Baker_Creek, CAMnet, KnoxBurns, Manitoba_MesoNET, MAWN_MesoNET, Alberta, NDAWN_MesoNET]
