# Supplementary material for: Validation of Pan-Arctic Soil Temperatures in Modern Reanalysis and Data Assimilation Systems
Source: Copernicus journal article supplement (doi:10.5194/tc-2022-5), 2022-01-25
Supplement: Supplementary file 2 [file tc-2022-5-supplement-version5.zip]

Archive with 2 entries (2 files):
- tc-2022-5-supplement-version5/TC-2022-5_InSitu_MetaData.xlsx
- tc-2022-5-supplement-version5/tc-2022-5-supplemental-figures.pdf
